# Supplementary material for: Comprehensive analysis of correlation coefficients estimated from pooling heterogeneous microarray data
Source: PubMed Central journal article supplement (PMC3765419; doi:10.1186/1471-2105-14-214), 2013-07-04
Supplement: 1471-2105-14-214-S1.pdf [file 1471-2105-14-214-S1.pdf]

## Supplemental Figures

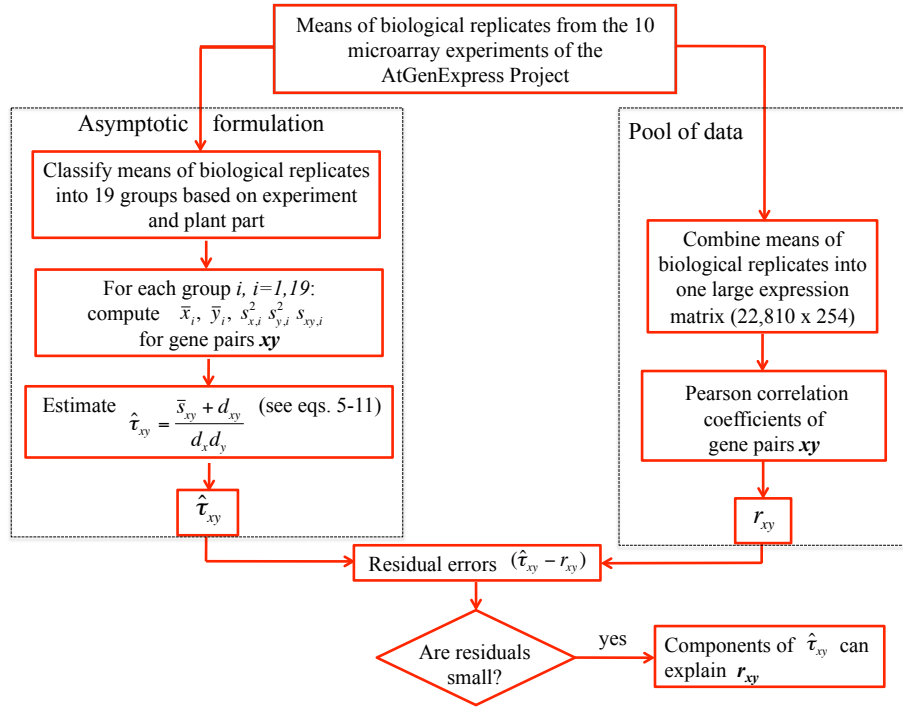

Figure 1: Diagram shows an overview of our methodology for dissecting the components of the Pearson correlation coefficient obtained  $r_{xy}$  from a pool of 19 groups of microarray data.

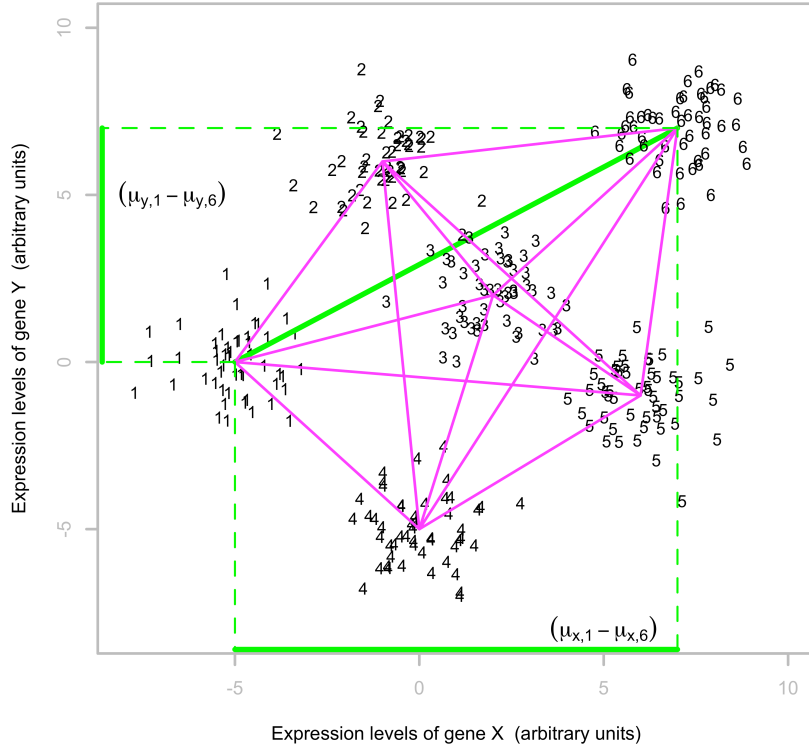

Figure 2: Illustration in a two-dimensional gene expression space of the effect of heterogeneities due to groups' mean differences on Pearson correlation coefficients: combination of 6 groups into a pool; each group contains 50 data points representing a gene-pair  $xy$  simulated according to multivariate normal distributions, where  $\Sigma_{xy,i} = \begin{pmatrix} 1 & 0 \\ 0 & 1 \end{pmatrix}$  for  $i=1,6$  and  $\mu_{xy,i} \neq \mu_{xy,j}$  for  $i \neq j$ . Data points of each group are portrayed by their corresponding group number in a two-dimensional gene expression space. Segments represent vectors of differences between means among all pairwise combinations of 6 groups. Projections into gene-X and gene-Y axes of the mean difference vector between groups 1 and 6 are shown as a green segment. The sum of all cross products between pairs of projections has a determining effect on Pearson correlations estimated directly from the pool of groups.

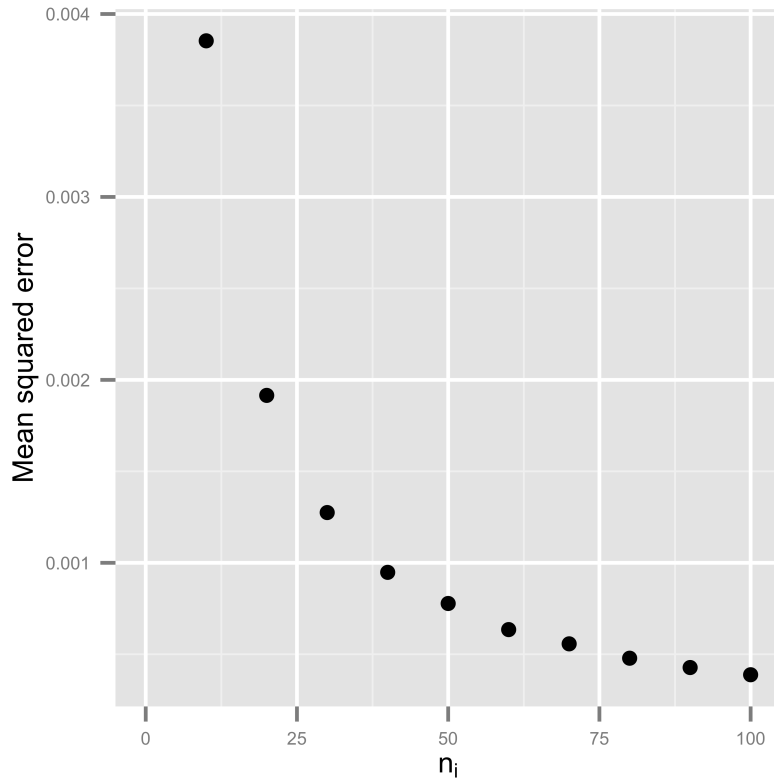

Figure 3: Mean-squared error  $(\tau_{xy} - \hat{\tau}_{xy})^2$  vs.  $n_i$  ( $10 \leq n_i \leq 100$ ) shows the influence of number of elements within groups on estimates of the asymptotic coefficients.  $\tau_{xy}$  was obtained from plugging population parameters  $\mu_{xy,i}$  and  $\Sigma_{xy,i}$  into equation 1, whereas  $\hat{\tau}_{xy}$  was obtained from group parameters. The correspondence between  $\tau_{xy}$  and  $\hat{\tau}_{xy}$  is good even for  $n_i = 10$ .

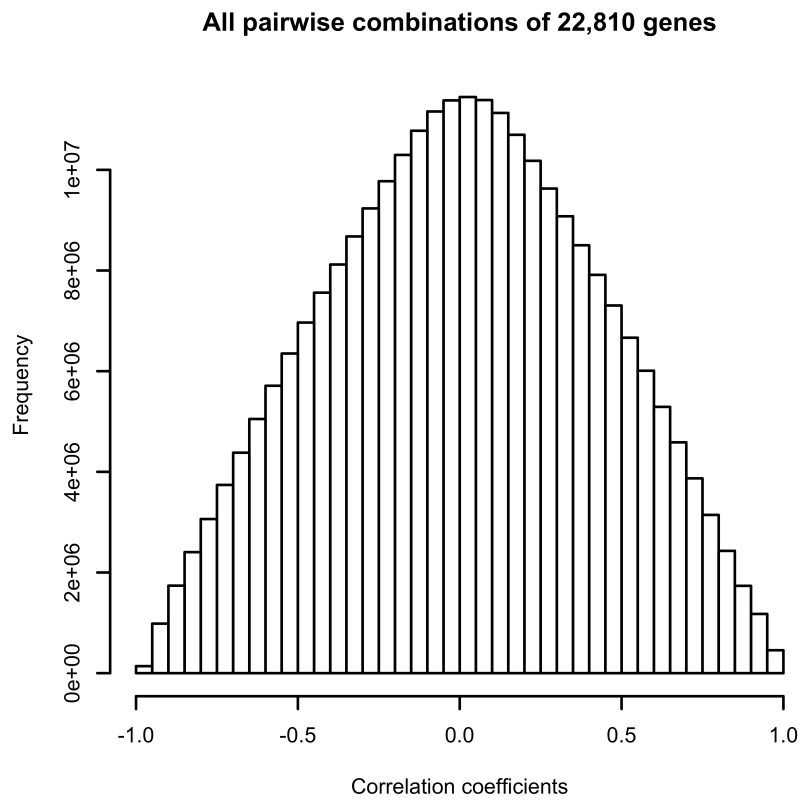

Figure 4: Histogram of Pearson correlation coefficients of all pairwise combinations of 22,810 genes (> 260 million coefficients) in the large expression matrix.

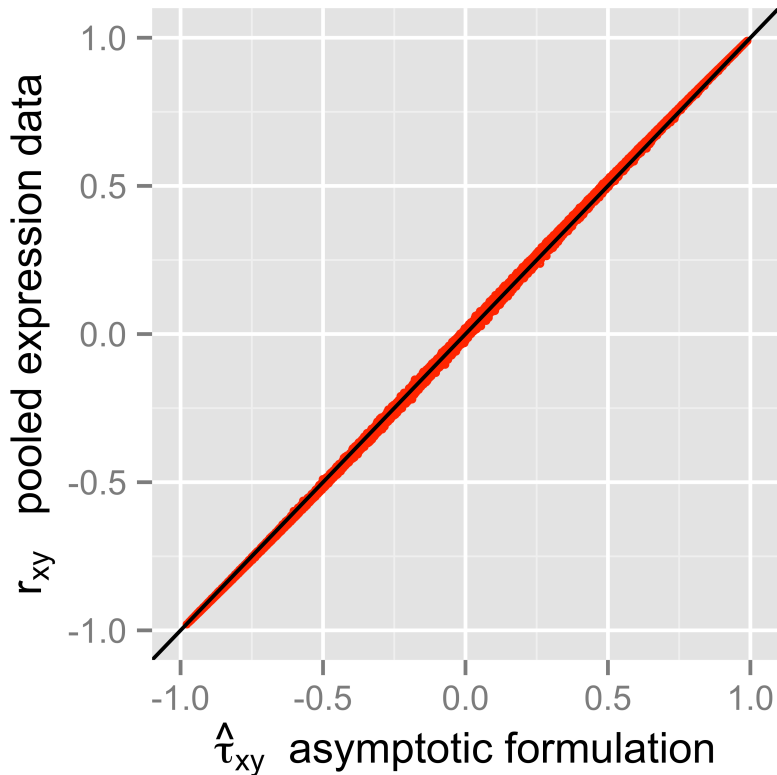

Figure 5: This scatterplot shows the good agreement between  $r_{xy}$  and  $\hat{\tau}_{xy}$ , in which data points lie around the diagonal. This plot also shows that data points tend to lie closer to the diagonal around  $\pm 1$ , which indicates that residual errors ( $r_{xy} - \hat{\tau}_{xy}$ ) tend to be smaller as  $|r_{xy}|$  approaches  $\pm 1$ . Interestingly, coefficients greater than 0.5 tend to show slightly larger values when estimated directly from the large expression matrix, whereas the contrary is observed for coefficients less than  $-0.5$  (i.e. data points tend to lie above the diagonal for  $r_{xy} > 0.5$ , whereas they lie below the diagonal for  $r_{xy} < -0.5$ ).

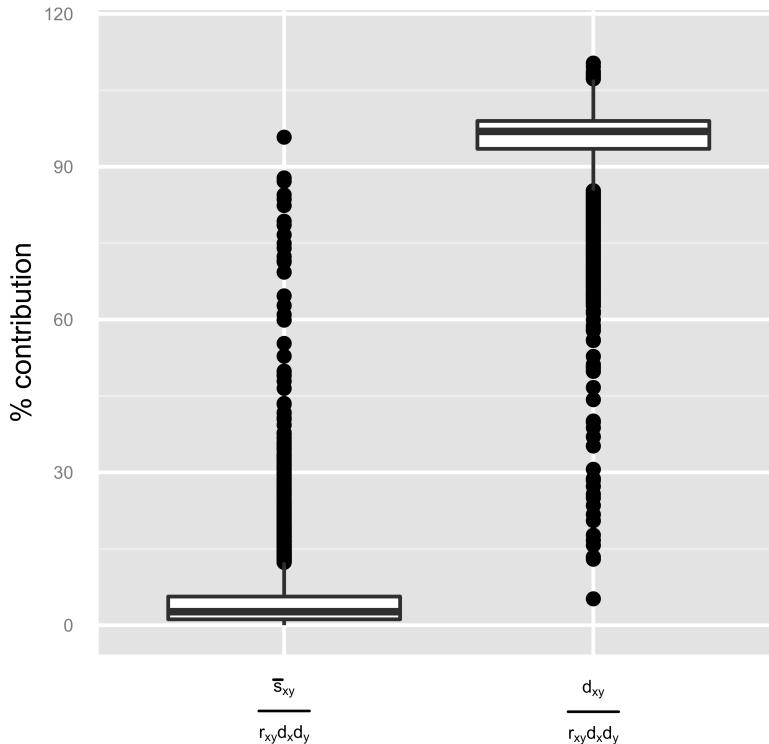

Figure 6: Boxplots of the percentage contribution of the covariance and the mean differences terms on the magnitude of  $|r_{xy}| \geq 0.7$ , i.e.  $\frac{\bar{s}_{xy}}{r_{xy}d_xd_y} + \frac{d_{xy}}{r_{xy}d_xd_y} \approx 1$ . The median of  $\frac{\bar{s}_{xy}}{r_{xy}d_xd_y}$  % is 1.98% with 50% of the data having a value between 0.04% and 5.32%. Conversely, the median of  $\frac{d_{xy}}{r_{xy}d_xd_y}$  % is 96.93% with 50% of the data having a value between 93.51% and 98.98%. There are 738 outliers in the right boxplot of Figure 7, ranging from 12% to 96%, but only 14 of them represent a contribution larger than 70% (the median of these outliers is 17%). There are 608 outliers in the right boxplot of Figure 7 ranging from 5% to 82%, and the median of these outliers is 80%. In addition, this boxplot shows 14 outliers whose contribution is above 100%, which then implies a negative contribution of the covariance term on the magnitude of  $r_{xy}$ .

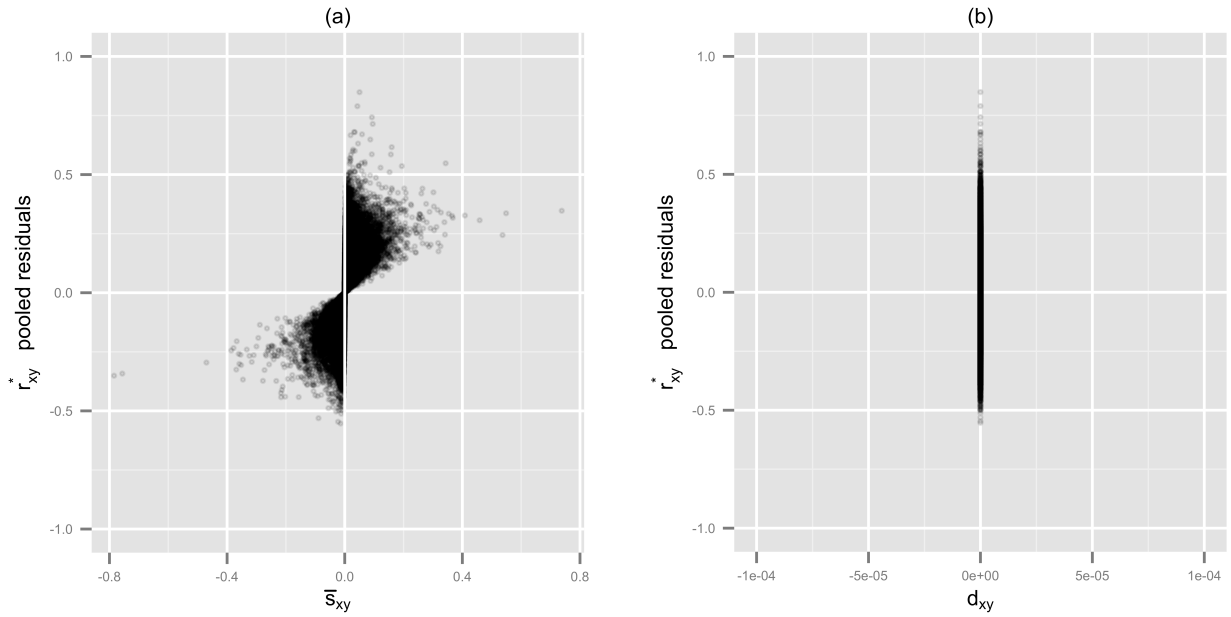

Figure 7: Influence of sample covariances and means of 19 groups on signs of Pearson correlation coefficients estimated from the pooled residuals: (a)  $r_{xy}^*$  vs.  $\bar{s}_{xy} = \sum_i \lambda_i s_{xy,i}$  and (b)  $r_{xy}^*$  vs.  $d_{xy} = \sum_i \sum_{j>i}^{19} \lambda_i \lambda_j (\bar{x}_i - \bar{x}_j)(\bar{y}_j - \bar{y}_i)$ ;  $r_{xy}^*$  have only the covariance component of equation 7 because mean differences among groups were successfully removed by fitting linear models to each gene.

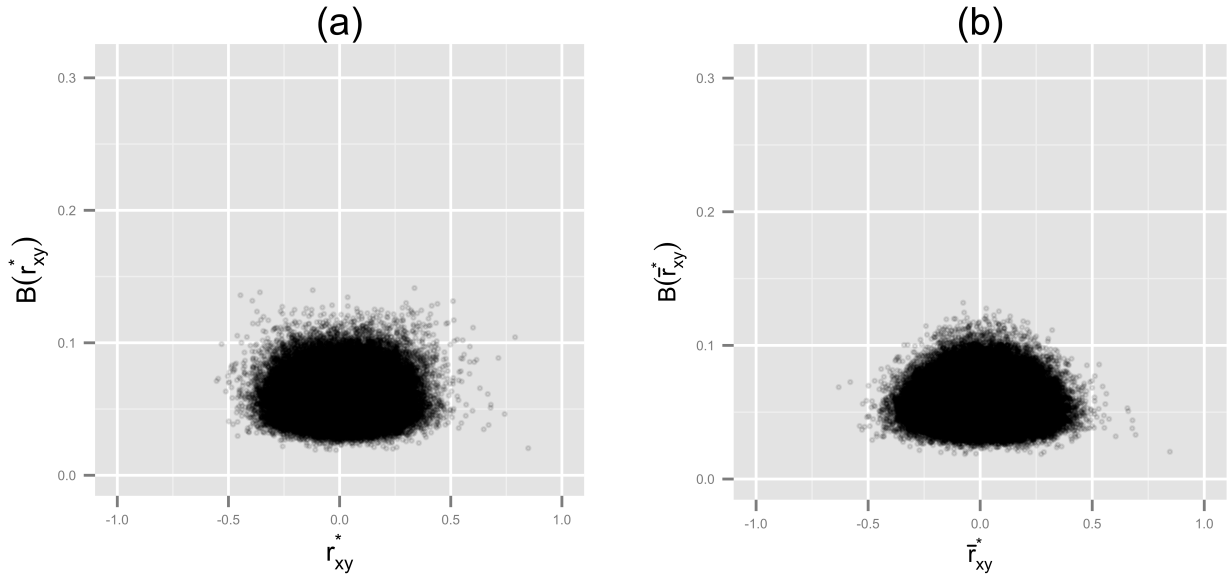

Figure 8: Assessment of biases of the correlation coefficients estimated from 19 groups of residuals data:  $B(\hat{\rho}_{xy}) = \sqrt{\frac{\sum_{i=1}^{19} \lambda_i (\hat{\rho}_{xy} - \hat{\rho}_{xy,i})^2}{19}}$  for (a)  $\hat{\rho}_{xy} = r_{xy}^*$ , the Pearson correlation coefficients estimated directly from the pooled residuals; (b)  $\hat{\rho}_{xy} = \bar{r}_{xy}^*$ , the average of correlations between expression residuals within  $i = 1, 19$  groups;  $\hat{\rho}_{xy,i}$  is the correlation between expression residuals within each group.
